# Supplementary material for: Endosymbiotic adaptations in three new bacterial species associated with Dictyostelium discoideum: Paraburkholderia agricolaris sp. nov., Paraburkholderia hayleyella sp. nov., and Paraburkholderia bonniea sp. nov
Source: PeerJ. 2020 May 22;8:e9151. doi: 10.7717/peerj.9151 (PMC7247526; doi:10.7717/peerj.9151)
Supplement: Supplemental Information 2 [file peerj-08-9151-s002.xlsx]

## Sheet: Optimal Bacteria GroTemp
Queller/Strassmann Research Group - 2019: Endosymbiotic adaptations in three new bacterial species associated with Dictyostelium discoideum: Burkholderia agricolaris sp. nov., Burkholderia hayleyella sp. nov., and Burkholderia bonniea sp. nov.
Bacteria growth results on SM/5 agar media (2 g glucose, 2 g Oxoid bactopeptone, 2 g Oxoid yeast extract, 0.2 g MgSO4, 1.9 g KH2PO4, 1 g K2HPO4, and 15.5 g agar per liter DDH2O) at 5 different temperatures
24 Hour Results:
Clone	Species	Temp (Celcius)	Original Data Code	No Growth	Little Growth	Moderate Growth	Excellent Growth
Bf	B. fungorum	4	NG	X
Bf	B. fungorum	22	MG			X
Bf	B. fungorum	30	MG			X
Bf	B. fungorum	37	EG				X
Bf	B. fungorum	45	NG	X
Bp	B. phymatum	4	NG	X
Bp	B. phymatum	22	MG			X
Bp	B. phymatum	30	MG			X
Bp	B. phymatum	37	EG				X
Bp	B. phymatum	45	NG	X
Bx	B. xenovorans	4	NG	X
Bx	B. xenovorans	22	LG		X
Bx	B. xenovorans	30	EG				X
Bx	B. xenovorans	37	EG				X
Bx	B. xenovorans	45	NG	X
BaQS31	B. agricolaris	4	NG	X
BaQS31	B. agricolaris	22	MG			X
BaQS31	B. agricolaris	30	EG				X
BaQS31	B. agricolaris	37	MG			X
BaQS31	B. agricolaris	45	NG	X
BaQS70	B. agricolaris	4	NG	X
BaQS70	B. agricolaris	22	MG			X
BaQS70	B. agricolaris	30	EG				X
BaQS70	B. agricolaris	37	EG				X
BaQS70	B. agricolaris	45	NG	X
BaQS159	B. agricolaris	4	NG	X
BaQS159	B. agricolaris	22	MG			X
BaQS159	B. agricolaris	30	EG				X
BaQS159	B. agricolaris	37	MG			X
BaQS159	B. agricolaris	45	NG	X
BaQS175	B. agricolaris	4	NG	X
BaQS175	B. agricolaris	22	MG			X
BaQS175	B. agricolaris	30	EG				X
BaQS175	B. agricolaris	37	MG			X
BaQS175	B. agricolaris	45	NG	X
BaQS317	B. agricolaris	4	NG	X
BaQS317	B. agricolaris	22	MG			X
BaQS317	B. agricolaris	30	EG				X
BaQS317	B. agricolaris	37	EG				X
BaQS317	B. agricolaris	45	NG	X
BaQS983	B. agricolaris	4	NG	X
BaQS983	B. agricolaris	22	MG			X
BaQS983	B. agricolaris	30	EG				X
BaQS983	B. agricolaris	37	MG			X
BaQS983	B. agricolaris	45	NG	X
BaQS1007	B. agricolaris	4	NG	X
BaQS1007	B. agricolaris	22	MG			X
BaQS1007	B. agricolaris	30	EG				X
BaQS1007	B. agricolaris	37	MG			X
BaQS1007	B. agricolaris	45	NG	X
BhQS11	B. hayleyella	4	NG	X
BhQS11	B. hayleyella	22	LG		X
BhQS11	B. hayleyella	30	MG			X
BhQS11	B. hayleyella	37	NG	X
BhQS11	B. hayleyella	45	NG	X
BhQS21	B. hayleyella	4	NG	X
BhQS21	B. hayleyella	22	LG		X
BhQS21	B. hayleyella	30	MG			X
BhQS21	B. hayleyella	37	NG	X
BhQS21	B. hayleyella	45	NG	X
BhQS22	B. hayleyella	4	NG	X
BhQS22	B. hayleyella	22	LG		X
BhQS22	B. hayleyella	30	MG			X
BhQS22	B. hayleyella	37	NG	X
BhQS22	B. hayleyella	45	NG	X
BhQS46	B. hayleyella	4	NG	X
BhQS46	B. hayleyella	22	LG		X
BhQS46	B. hayleyella	30	MG			X
BhQS46	B. hayleyella	37	NG	X
BhQS46	B. hayleyella	45	NG	X
BhQS115	B. hayleyella	4	NG	X
BhQS115	B. hayleyella	22	LG		X
BhQS115	B. hayleyella	30	MG			X
BhQS115	B. hayleyella	37	NG	X
BhQS115	B. hayleyella	45	NG	X
BhQS155	B. hayleyella	4	NG	X
BhQS155	B. hayleyella	22	LG		X
BhQS155	B. hayleyella	30	MG			X
BhQS155	B. hayleyella	37	NG	X
BhQS155	B. hayleyella	45	NG	X
BhQS530	B. hayleyella	4	NG	X
BhQS530	B. hayleyella	22	LG		X
BhQS530	B. hayleyella	30	MG			X
BhQS530	B. hayleyella	37	NG	X
BhQS530	B. hayleyella	45	NG	X
BbQS433	B. bonniea	4	NG	X
BbQS433	B. bonniea	22	LG		X
BbQS433	B. bonniea	30	MG			X
BbQS433	B. bonniea	37	NG	X
BbQS433	B. bonniea	45	NG	X
BbQS859	B. bonniea	4	NG	X
BbQS859	B. bonniea	22	LG		X
BbQS859	B. bonniea	30	MG			X
BbQS859	B. bonniea	37	NG	X
BbQS859	B. bonniea	45	NG	X
