# Supplementary material for: Endosymbiotic adaptations in three new bacterial species associated with Dictyostelium discoideum: Paraburkholderia agricolaris sp. nov., Paraburkholderia hayleyella sp. nov., and Paraburkholderia bonniea sp. nov
Source: PeerJ. 2020 May 22;8:e9151. doi: 10.7717/peerj.9151 (PMC7247526; doi:10.7717/peerj.9151)
Supplement: Supplemental Information 3 [file peerj-08-9151-s003.xlsx]

## Sheet: Nonsymbionts
Queller/Strassmann Research Group - 2019: Endosymbiotic adaptations in three new bacterial species associated with Dictyostelium discoideum: Burkholderia agricolaris sp. nov., Burkholderia hayleyella sp. nov., and Burkholderia bonniea sp. nov.
Biolog GN2 Microplate - http://www.ecologiemicrobiennelyon.fr/IMG/pdf/GN2-1.pdf
Burkholderia fungorum
<>	1	2	3	4	5	6	7	8	9	10	11	12		Scored as positive if the absorbance minus the blank control absorbance is above 97% of the blank control.
A	0.4434	0.3891	0.6576	0.7492	1.7607	1.5847	1.2049	2.2646	1.7661	1.5307	1.9685	0.6757
B	0.393	2.1783	2.158	2.3759	1.2043	2.4861	1.8331	0.7906	0.3655	0.4058	2.1459	2.2488		purple are above the 97.5% of the blank values
C	1.3401	0.3685	0.4268	0.385	1.8304	1.9133	0.3384	0.4262	0.3847	1.882	2.123	1.2435		(equivalent to 5% for two-tailed distribution)
D	1.356	1.9256	2.4651	2.1678	1.7845	2.4907	2.2134	2.3525	2.4259	1.7678	2.4364	0.4697
E	1.591	0.4035	1.8221	2.7066	1.3181	2.3963	1.3614	1.6242	1.9912	2.4493	1.1299	2.1353		97.5 cut-off
F	1.9994	1.758	0.9854	1.194	1.5495	1.9892	1.5376	2.0422	2.3663	2.6204	1.1086	1.386		values above
G	1.7461	0.4252	1.6665	0.8294	1.5605	1.1886	1.8308	1.2867	2.3042	1.4347	1.09	2.0296		0.875715		0.4434	0.432315	0.875715
H	1.1202	0.4685	1.4033	0.378	0.4354	0.6548	1.8892	0.4181	1.6604	0.4009	0.3869	0.4147
Burkholderia xenovorans LB400
<>	1	2	3	4	5	6	7	8	9	10	11	12
A	0.5778	0.5216	1.1236	1.3308	2.3284	2.1287	1.5437	2.5623	0.5816	1.8774	2.5185	0.7118		97.5 cut-off
B	0.5252	2.5987	2.524	2.5687	2.1047	2.6955	2.5728	0.5501	0.5776	0.5336	2.54	2.4856		values above
C	1.0512	0.5321	0.5056	0.5361	2.3365	2.6619	0.5344	0.5977	0.6251	0.5486	2.2194	2.1396		1.14115
D	2.4361	2.7291	2.3941	2.6935	2.0735	2.6818	2.9464	2.8881	2.6175	2.5263	2.435	1.3284
E	2.4715	1.6225	1.7645	2.5126	1.4436	2.1335	1.9614	1.8467	1.9279	2.2426	1.4798	2.6877		0.5778	0.563355	1.14115
F	2.6083	2.2741	1.72	2.1301	2.0215	2.1616	2.1251	2.639	2.5123	2.81	1.2527	2.3398
G	2.4566	1.9945	2.6046	1.3882	1.9854	2.3397	2.578	2.0292	2.6267	1.9262	1.6028	2.2595
H	1.9028	0.5961	2.3086	0.5297	0.4938	0.6043	2.2018	0.4774	1.8396	1.5833	0.5511	2.0502
B. phymatum
<>	1	2	3	4	5	6	7	8	9	10	11	12
A	0.5323	0.4373	0.572	0.675	2.0844	2.1138	1.2795	2.6194	2.6513	2.6025	2.5647	0.4733		97.5 cut-off
B	0.4427	2.65	2.5959	2.7145	0.4721	2.8334	2.7419	0.5355	0.4882	0.4073	2.6946	2.7941		values above
C	0.5673	0.4928	0.4234	2.5617	2.6007	2.4115	3.0012	2.8737	0.478	2.4056	2.7283	1.5101		1.05129
D	1.593	2.8929	2.7815	2.2527	1.9987	2.9385	2.8335	2.8907	3.0538	2.2023	2.8345	0.8716
E	2.5237	0.453	2.4172	2.805	1.5456	2.6118	2.2603	2.0855	2.8994	2.9048	1.3242	2.6724		0.5323	0.518992	1.05129
F	2.4044	2.5318	1.2485	1.687	2.099	2.0822	1.8052	2.8826	3.0021	2.8772	0.5163	1.8765
G	2.8579	2.6499	2.3864	1.7532	2.2726	2.5057	2.8139	1.5432	2.5311	1.8604	2.0469	2.0933
H	1.7962	0.5464	0.4591	0.4588	1.9567	0.4824	1.8108	0.495	2.3135	0.4834	0.4788	0.7377

## Sheet: B. agricolaris
Queller/Strassmann Research Group - 2018
Biolog GN2 Microplate - http://www.ecologiemicrobiennelyon.fr/IMG/pdf/GN2-1.pdf
BaQS31
<>	1	2	3	4	5	6	7	8	9	10	11	12
A	0.4508	0.3476	0.7395	1.0472	2.3389	2.7182	2.6734	2.4949	2.7846	2.7223	2.7857	1.0357		97.5 cut-off
B	0.4018	2.6461	2.7708	2.8023	2.3474	2.5218	2.9444	2.7678	2.2783	0.5883	2.6604	2.6751		values above
C	0.4127	0.3942	0.4468	0.3484	2.5493	2.5973	0.3604	0.3966	0.507	2.2867	2.2426	1.6946		0.89033
D	1.6251	2.5091	2.4018	2.0848	2.2265	2.3446	2.608	2.5568	2.5307	2.6632	2.316	2.0996
E	2.7862	0.347	2.4283	2.5484	1.9277	2.2073	1.4392	1.6553	2.4974	2.4126	2.8628	2.0535		0.4508	0.43953	0.89033
F	2.6088	2.7161	1.4752	2.4177	2.6489	2.4802	2.7762	2.6499	2.328	2.6429	1.8421	2.2679
G	2.6932	2.8496	2.7449	2.1605	2.7484	2.8107	2.5023	2.5558	2.3202	2.4221	1.8348	2.2521
H	2.5919	2.6688	2.5451	0.3861	2.1746	1.4033	1.0866	0.3183	2.6446	0.7722	0.3974	1.6892
BaQS70
<>	1	2	3	4	5	6	7	8	9	10	11	12
A	0.2931	0.245	0.3965	0.3342	1.3347	0.911	1.1246	1.5353	1.0909	1.3312	0.9867	0.3882		97.5 cut-off
B	0.2349	1.3596	1.7233	1.8508	0.6935	1.9192	1.1241	0.2692	0.2564	0.2798	1.6181	1.4616		values above
C	0.5324	0.2459	0.2478	0.2511	1.3754	1.219	0.2736	0.2512	0.2315	0.3059	1.5398	0.6548		0.578873
D	0.5848	1.2931	1.4838	0.8358	1.3683	1.7479	1.631	1.9414	1.7558	1.0268	1.96	0.333
E	0.915	0.2551	1.0463	1.783	0.3525	1.3345	0.5962	0.7434	1.6773	1.8453	0.7389	1.3607		0.2931	0.285773	0.578873
F	1.2096	1.1974	0.7079	0.7505	0.8795	1.1153	0.7924	1.4783	1.2992	1.9439	0.4573	0.8266
G	1.2062	0.7218	1.1054	0.5402	0.8724	0.91	1.1114	0.8184	1.5868	1.0152	0.6233	1.0681
H	0.6899	1.5348	0.9053	0.2449	0.3989	0.2694	0.2864	0.3212	0.7114	0.2636	0.2554	0.2668
BaQS159
<>	1	2	3	4	5	6	7	8	9	10	11	12
A	0.4118	0.377	0.5751	0.5452	1.5311	1.4196	1.7728	2.3851	2.0651	2.1683	1.8746	0.3686		97.5 cut-off
B	0.3963	2.1517	2.4999	2.3281	0.4231	2.5725	1.912	0.4282	0.4129	0.3642	2.3979	1.8645		values above
C	0.7979	0.3801	0.4167	0.3788	2.3301	2.2204	0.4091	0.4283	0.3932	0.477	2.5235	1.1285		0.813305
D	1.1399	2.6399	2.6036	1.7634	2.0831	0.6206	2.1982	2.3987	2.275	1.4678	2.2155	0.4241
E	1.6844	0.3964	1.711	2.4298	0.4964	2.4735	0.9425	1.4651	2.2083	2.3446	1.1295	2.1577		0.4118	0.401505	0.813305
F	2.4044	1.9146	0.3731	1.1077	1.5713	1.7745	1.3462	2.4872	2.2724	2.5708	0.6727	1.5331
G	2.1342	1.499	1.917	0.8726	1.2198	1.319	1.937	1.3495	2.1176	1.6436	0.6721	1.7822
H	1.7084	2.6265	1.8098	0.4124	0.6266	0.5086	0.4419	0.3966	1.5303	0.3953	0.3954	0.3691
BaQS175
<>	1	2	3	4	5	6	7	8	9	10	11	12
A	0.4365	0.3459	0.8328	1.1182	2.1324	2.7412	2.7304	2.5971	2.7478	2.8041	2.8255	1.1946		97.5 cut-off
B	0.3856	2.7336	2.8106	2.7818	2.2779	2.5368	3.0165	2.9092	2.327	0.652	2.7508	2.8117		values above
C	0.4011	0.4712	0.4529	0.4108	2.7373	2.7165	0.3733	0.4142	0.5415	2.0294	2.5049	2.1239		0.862088
D	1.6481	2.6039	2.4345	2.1611	2.3427	2.3832	2.609	2.7375	2.6354	2.6734	2.449	2.1242
E	2.6772	0.394	2.2652	2.6643	2.0432	2.4317	1.501	1.7809	2.6721	2.529	2.8787	2.3726		0.4365	0.425588	0.862088
F	2.5868	2.7505	1.6007	2.4558	2.7151	2.6099	2.7943	2.6866	2.5595	2.6736	1.8708	2.3223
G	2.7191	2.9058	2.792	2.2356	2.7752	2.8527	2.6387	2.4781	2.4133	2.8167	1.881	2.39
H	2.6644	2.6713	2.6584	0.4176	2.172	1.2793	0.9524	0.3308	2.7946	1.0466	0.4704	2.2065
BaQS317
<>	1	2	3	4	5	6	7	8	9	10	11	12
A	0.5332	0.509	0.9321	1.1114	1.8109	1.6816	1.8411	2.5543	2.3599	2.2171	2.163	1.2076		97.5 cut-off
B	0.5321	2.5622	2.58	2.7638	0.5503	2.5362	2.1773	1.2449	0.5217	1.0832	2.577	2.7379		values above
C	0.5782	0.5217	0.4353	0.4705	2.349	2.407	0.4841	0.4712	0.6306	0.7958	2.5447	1.9214		1.05307
D	1.7128	1.9734	2.6817	2.3608	2.1694	2.4601	2.7864	2.5772	2.6191	2.3444	2.5183	0.5394
E	1.9773	0.5312	2.2704	2.7894	1.6336	2.6703	1.2426	1.8374	2.6378	2.731	1.3733	2.6194		0.5332	0.51987	1.05307
F	2.6747	2.4826	0.9836	1.5787	1.909	2.1478	1.6137	2.6574	2.7588	2.7043	1.3321	1.806
G	2.6667	1.8634	2.1859	1.0945	2.0982	1.9188	2.3845	1.577	2.6496	2.1111	0.9925	2.2423
H	2.3046	0.6103	1.7642	0.5189	0.4937	0.5671	2.2751	0.5662	2	1.0891	0.5262	1.5574
BaQS983
<>	1	2	3	4	5	6	7	8	9	10	11	12
A	0.4942	0.5541	1.0848	1.2878	2.0138	1.7787	2.0034	2.7115	2.2465	2.305	2.2735	1.2607		97.5 cut-off
B	0.5245	2.5076	2.6412	2.5913	1.9225	2.8418	2.4599	1.3116	0.5292	1.1641	2.4623	2.4588		values above
C	0.5558	0.4958	0.5074	0.6201	2.2985	2.4264	0.4919	0.5531	0.6086	1.2648	2.4423	1.4751		0.976045
D	1.886	2.3312	2.73	2.4922	2.2315	2.4642	2.7076	2.6888	2.6398	2.2801	2.5414	1.2946
E	2.158	0.6658	2.3533	2.8056	1.8983	2.5531	1.4135	2.0726	2.521	2.8064	1.5281	2.6591		0.4942	0.481845	0.976045
F	2.4912	2.3642	1.3564	1.9749	2.1776	2.1979	1.9769	2.3727	2.7917	2.7339	1.3916	2.2785
G	2.6748	1.9083	2.1134	1.216	2.2333	2.1475	2.4367	1.7547	2.6641	2.0389	1.2708	2.3388
H	1.8962	2.7179	2.197	0.527	0.4896	0.5459	2.5685	0.5404	1.9367	1.3871	0.53	1.9752
BaQS1007
<>	1	2	3	4	5	6	7	8	9	10	11	12
A	0.6248	0.6022	1.2275	1.3515	1.9985	1.9594	2.1752	2.5888	2.3644	2.286	2.2015	1.508		97.5 cut-off
B	0.5658	2.7489	2.781	2.8896	0.6973	2.7926	2.3323	1.4352	0.5775	1.2364	2.533	2.6039		values above
C	0.5718	0.5231	0.5615	0.5888	2.6169	2.596	0.5456	0.656	0.7537	1.2372	2.6516	1.9534		1.23398
D	2.1491	2.5082	2.5196	2.4652	2.4147	2.6763	2.7215	2.8512	2.7468	2.3736	2.7112	1.3914
E	2.1485	1.45	2.4697	2.7016	1.9794	2.4003	1.5469	2.0826	2.7373	2.7249	1.7315	2.6388		0.6248	0.60918	1.23398
F	2.6641	2.5536	1.1824	1.8645	2.1762	2.3901	2.0229	2.5918	2.6341	2.7794	1.6525	2.4921
G	2.8413	2.021	2.3924	1.5105	2.0844	2.1226	2.515	1.9434	2.661	2.1745	1.3676	2.4721
H	2.5899	2.8446	2.3094	0.5816	0.5208	0.5957	2.5926	0.5685	2.2663	1.5359	0.5688	1.8084

## Sheet: B. hayleyella
Queller/Strassmann Research Group - 2018
Biolog GN2 Microplate - http://www.ecologiemicrobiennelyon.fr/IMG/pdf/GN2-1.pdf
BhQS11
<>	1	2	3	4	5	6	7	8	9	10	11	12
A	0.5412	0.5479	0.5205	0.5164	1.5007	1.1026	0.5235	0.5395	0.5357	0.5544	0.5222	0.4968		97.5 cut-off
B	0.5197	0.7119	1.1518	0.516	0.483	2.6805	0.5663	0.5586	0.5159	0.5533	0.4874	1.2165		values above
C	0.6054	0.5266	0.4711	0.5285	0.5656	0.5716	0.5563	0.5944	0.477	0.5457	2.7859	0.541		1.06887
D	1.7363	0.5936	0.592	0.5162	0.5258	0.5366	1.3925	0.6257	0.5339	1.0696	2.8071	0.7064
E	0.5949	0.5452	2.3986	2.8646	0.4989	1.4933	0.5661	1.2181	0.5468	0.5693	0.5632	1.9129		0.5412	0.52767	1.06887
F	2.1075	0.7344	0.5249	0.7367	1.1361	0.9468	1.1365	2.257	1.9538	2.8193	0.544	2.0054
G	0.6241	0.4914	0.5727	0.5616	0.5264	1.4511	0.575	0.8309	2.0345	1.6656	0.4573	0.809
H	0.6995	0.7128	0.4154	0.5041	0.5021	0.5211	0.5285	0.545	0.5379	0.5253	0.5178	0.5404
BhQS21
<>	1	2	3	4	5	6	7	8	9	10	11	12
A	0.5088	0.4605	0.4973	0.4836	1.7112	1.2084	0.4775	0.5242	0.4955	0.4581	0.4793	0.472		97.5 cut-off
B	0.4932	1.1159	1.6008	0.5074	0.5003	2.6599	0.488	0.4898	0.4865	0.488	0.4542	1.1782		values above
C	0.5382	0.4979	0.4763	0.5184	0.5132	0.4932	0.487	0.4695	0.4531	0.4492	2.716	0.4999		1.00488
D	1.4201	0.5953	0.5156	0.4659	0.4824	0.4671	1.1494	0.5389	0.4451	1.3211	2.5207	0.5479
E	0.5503	0.4576	2.3753	2.6634	0.4891	1.7558	0.4905	1.6311	0.456	0.4839	0.5949	1.8989		0.5088	0.49608	1.00488
F	1.662	0.9187	0.4398	0.495	0.5926	1.0486	1.1444	2.0555	2.0877	2.7544	0.5526	2.0543
G	0.5543	0.4942	0.4816	0.4846	0.4775	1.6107	0.4801	0.5676	1.927	1.7633	0.4214	1.1038
H	0.5805	0.581	0.4929	0.4712	0.4742	0.4807	0.4752	0.4659	0.5003	0.4913	0.4858	0.4983
BhQS22
<>	1	2	3	4	5	6	7	8	9	10	11	12
A	0.5381	0.5356	0.578	0.5075	1.7143	1.2146	0.5062	0.5331	0.4883	0.4828	0.5406	0.5213		97.5 cut-off
B	0.5595	1.6074	1.5912	0.5393	0.4905	2.7291	0.4952	0.5163	0.515	0.5395	0.5218	1.4541		values above
C	0.5643	0.5422	0.4624	0.5048	0.5296	0.5338	0.5719	0.515	0.4914	0.5027	2.8007	0.6128		1.06275
D	1.6153	0.5632	0.5103	0.5158	0.4987	0.561	1.6064	1.4487	0.5577	1.468	2.7186	0.6015
E	0.6004	0.4968	2.5469	2.8482	0.549	2.0353	0.5256	1.455	0.4905	0.4657	0.5831	2.3309		0.5381	0.524648	1.06275
F	2.0783	1.3278	0.5	0.991	1.5914	1.4046	1.434	2.3866	2.187	2.6798	0.5695	2.0863
G	0.5847	0.5272	0.5306	0.4883	0.5437	1.7265	0.4884	0.7207	2.5019	1.7842	0.5584	1.0293
H	0.8294	0.5927	0.5519	0.5464	0.5602	0.5019	0.4986	0.5238	0.4836	0.4695	0.5606	0.5217
BhQS46
<>	1	2	3	4	5	6	7	8	9	10	11	12
A	0.4992	0.4656	0.5317	0.4921	1.7861	1.2741	0.486	0.5347	0.4602	0.4718	0.4474	0.4329		97.5 cut-off
B	0.4715	0.5253	0.4978	0.5886	0.4622	2.525	0.501	0.4345	0.4727	0.4766	0.4253	1.3374		values above
C	0.5171	0.4779	0.427	0.4724	0.4669	0.4597	0.4504	0.4445	0.4393	0.4536	2.5291	0.6535		0.98592
D	2.0372	0.5871	0.5871	0.4965	0.4784	0.4592	1.3318	1.0462	0.503	1.4123	2.3255	0.5024
E	0.5779	0.4581	2.3138	2.7979	0.586	1.7068	0.5184	1.5383	0.5988	0.522	0.5807	1.8454		0.4992	0.48672	0.98592
F	2.1096	0.5483	0.4622	1.0337	0.5462	1.4634	1.698	2.1162	1.613	2.693	0.4717	1.2929
G	0.5843	0.4601	0.557	0.4854	0.6425	1.3155	0.4701	1.1427	2.5717	0.8881	0.453	0.4628
H	0.5595	0.583	0.4724	0.5003	0.4959	0.4824	0.4739	0.4804	0.517	0.4548	0.463	0.4442
BhQS115
<>	1	2	3	4	5	6	7	8	9	10	11	12
A	0.527	0.5042	0.5927	0.5292	2.0224	1.6369	0.5011	0.6012	0.4726	0.4896	0.4783	0.4726
B	0.4884	0.5093	0.4833	0.7953	0.5211	2.6271	0.5322	0.499	0.5047	0.4588	0.4245	1.5304		97.5 cut-off
C	0.5557	0.5016	0.4535	0.5009	0.5151	0.5378	0.4941	0.4773	0.4536	0.4885	2.6545	0.8397		values above
D	2.2331	0.8351	0.8944	0.4927	0.4923	0.4825	1.7998	1.3575	0.5074	1.6405	2.4805	0.5415		1.04083
E	0.6381	0.4954	2.6327	2.8301	0.7875	2.0873	0.5071	1.6891	0.7826	0.6092	0.6693	2.1516
F	2.3958	0.5792	0.4947	1.4645	0.5289	1.8323	1.8548	2.5877	2.0261	2.6771	0.4705	1.4948		0.527	0.513825	1.04083
G	0.6396	0.5194	0.8519	0.5204	0.8011	1.6116	0.6318	1.3714	2.8087	1.2871	0.4717	0.5031
H	0.5647	0.6997	0.5008	0.5204	0.4956	0.5126	0.5114	0.5381	0.5364	0.4708	0.4815	0.4582
BhQS155
<>	1	2	3	4	5	6	7	8	9	10	11	12
A	0.5653	0.5428	0.5585	0.5276	1.4614	1.1312	0.5294	0.7426	0.5974	0.5557	0.543	0.5222		97.5 cut-off
B	0.5939	0.5537	0.9096	0.4884	0.5024	2.6727	0.5115	0.5152	0.5376	0.5747	0.4755	0.8441		values above
C	0.6295	0.5491	0.521	0.5256	0.5125	0.6298	0.6348	0.5281	0.5027	0.533	2.7094	0.5498		1.11647
D	1.8383	0.5514	0.6169	0.5138	0.4974	0.5408	1.4188	0.7063	0.5033	1.2798	2.6938	0.5763
E	0.6017	0.5295	2.6415	2.9573	0.5499	1.8161	0.6064	1.4495	0.4999	0.5642	0.6	2.0682		0.5653	0.551167	1.11647
F	1.9727	1.6075	0.5406	0.8689	1.3841	1.0161	1.1628	2.4671	2.5456	2.9698	0.9752	2.3115
G	0.6292	0.5427	0.511	0.6217	0.502	1.7804	0.5426	0.7599	2.5419	2.0121	0.4909	1.2242
H	0.6313	0.6456	0.5401	0.6073	0.5583	0.5442	0.6063	0.6162	0.5423	0.5319	0.5442	0.5367
BhQS530
<>	1	2	3	4	5	6	7	8	9	10	11	12
A	0.5526	0.5117	0.6212	0.5738	1.9433	1.2919	0.5054	0.562	0.5002	0.5329	0.5086	0.5026		97.5 cut-off
B	0.5752	0.5764	0.5256	0.6518	0.8163	2.645	0.5587	0.5151	0.4957	0.53	0.4801	1.4781		values above
C	0.5212	0.5275	0.4845	0.5165	0.6013	0.5864	0.533	0.5606	0.5081	0.512	2.6386	0.8637		1.09139
D	1.9402	0.7171	0.6572	0.5841	0.558	0.5579	1.4197	1.1767	0.5973	1.6478	2.5329	0.5819
E	0.5904	0.4781	2.3808	2.8298	0.8352	2.112	0.5281	1.6559	0.6484	0.6111	0.7013	1.9581		0.5526	0.538785	1.09139
F	2.0429	0.5889	0.5268	1.2888	0.5964	1.638	1.7551	2.1837	1.8706	2.7657	0.5297	1.5268
G	0.5759	0.4971	0.7628	0.5434	0.7279	1.5247	0.5119	1.2313	2.6223	1.2022	0.5237	0.5707
H	0.6065	0.5706	0.5196	0.5367	0.5213	0.5296	0.5313	0.5562	0.5584	0.511	0.5089	0.516

## Sheet: B. bonniea
Queller/Strassmann Research Group - 2018
Biolog GN2 Microplate - http://www.ecologiemicrobiennelyon.fr/IMG/pdf/GN2-1.pdf
BbQS859
<>	1	2	3	4	5	6	7	8	9	10	11	12
A	0.5595	0.5172	0.7483	0.7546	1.7694	1.7645	0.4974	2.074	0.5006	0.4807	0.5059	0.5571		97.5 cut-off
B	0.5414	1.2549	0.4569	0.641	0.5278	2.8246	0.5458	0.5418	0.4867	0.4683	0.4201	2.1726		values above
C	0.5719	0.5205	0.4991	0.5248	0.5169	0.4994	0.5282	0.542	0.5099	0.4948	2.5286	0.9089		1.10501
D	1.9933	3.0261	2.866	0.6847	0.6767	0.5271	1.9795	1.5687	0.5201	1.3482	2.5725	0.5208
E	0.6309	0.4724	2.5878	2.5487	1.0277	1.8784	0.5159	1.4135	0.6806	0.5883	0.563	2.0227		0.5595	0.545512	1.10501
F	2.5009	1.6704	0.4777	1.668	1.466	1.6519	1.9882	2.7179	2.7307	2.8547	0.4991	1.7965
G	0.6069	0.641	1.112	0.4769	0.6475	2.2457	0.6129	1.0836	2.7693	2.3752	0.4994	0.7537
H	0.5899	1.6417	0.4937	0.6051	0.4724	0.5201	0.5319	0.5416	0.5411	0.4978	0.4784	0.4894
BbQS433
<>	1	2	3	4	5	6	7	8	9	10	11	12
A	0.449	0.3863	0.5926	0.6571	1.9369	2.7242	0.4012	2.7557	0.3671	0.417	0.4233	0.5876		97.5 cut-off
B	0.4057	2.1375	0.3917	1.903	0.9579	2.8052	0.409	0.4273	0.3785	0.385	0.3793	2.6988		values above
C	0.4487	0.3893	0.3919	0.3931	0.375	0.3677	0.4222	0.4185	0.374	0.3545	2.9177	0.9365		0.886775
D	1.5424	2.8447	2.6168	0.5558	0.4959	0.4274	2.0895	1.6466	0.4584	1.5058	2.6353	0.4191
E	0.5104	0.4269	2.3382	0.4256	0.8072	2.3094	0.4307	1.1337	0.3914	0.3675	0.6507	2.5316		0.449	0.437775	0.886775
F	2.3866	2.8481	0.4201	1.3908	2.6173	2.7314	2.8267	2.8368	2.9105	2.8927	0.6557	2.4975
G	2.7903	0.5399	1.0877	0.4287	0.3534	2.8095	0.5635	1.2115	2.4825	2.7301	0.4862	1.9893
H	1.5387	2.5319	0.4202	0.4095	0.4052	0.4324	0.4184	0.3918	0.5618	0.3813	0.4164	0.4541
