# Supplementary material for: Endosymbiotic adaptations in three new bacterial species associated with Dictyostelium discoideum: Paraburkholderia agricolaris sp. nov., Paraburkholderia hayleyella sp. nov., and Paraburkholderia bonniea sp. nov
Source: PeerJ. 2020 May 22;8:e9151. doi: 10.7717/peerj.9151 (PMC7247526; doi:10.7717/peerj.9151)
Supplement: Supplemental Information 4 [file peerj-08-9151-s004.xlsx]

## Sheet: Length_Data
Queller/Strassmann Research Group - 2019: Endosymbiotic adaptations in three new bacterial species associated with Dictyostelium discoideum: Burkholderia agricolaris sp. nov., Burkholderia hayleyella sp. nov., and Burkholderia bonniea sp. nov.
BURKHOLDERIA LENGTHS (µm)
Species	B. agricolaris	B. agricolaris	B. agricolaris	B. agricolaris	B. agricolaris	B. agricolaris	B. agricolaris	B. hayleyella	B. hayleyella	B. hayleyella	B. hayleyella	B. hayleyella	B. hayleyella	B. hayleyella	B. bonniea	B. bonniea	B. phymatum	B. fungorum	B. xenovorans
Original Group	B1A	B1A	B1A	B1A	B1B	B1B	B1A	B2	B2	B2	B2	B2	B2	B2	B3	B3	Non-symbionts	Non-symbionts	Non-symbionts
Clone	BaQS31	BaQS70	BaQS159	BaQS175	BaQS317	BaQS983	BaQS1007	BhQS11	BhQS21	BhQS22	BhQS46	BhQS115	BhQS155	BhQS530	BbQS433	BbQS859	Bp	Bf	Bx
Individual	1.92	1.82	1.41	1.45	1.38	1.53	1.87	1.33	1.7	1.66	1.54	1.51	0.94	1.5	1.37	1.45	2.1	1.68	1.5
Measurements	1.86	1.54	1.56	1.21	1.36	1.74	1.1	1.34	1.82	1.3	1.45	1.47	1.38	1.32	1.18	1.41	2.23	1.42	1.58
(µm)	1.94	1.2	1.73	1.72	1.6	1.62	1.47	1.21	1.57	1.22	1.41	1.33	1.48	1.61	1.63	1.31	1.36	1.39	1.87
	1.28	1.09	1.72	1.75	1.91	1.85	1.45	1.22	2	1.44	1.38	1.1	1.72	1.45	1.08	1.48	1.61	1.53	1.69
	1.16	1.42	1.56	1.35	1.44	1.87	1.73	1.3	1.4	1.31	1.17	1.05	1.7	1.18	1.8	1.43	1.89	1.46	1.51
	1.07	1.31	1.72	1.46	1.23	1.76	2.03	1.24	1.5	0.85	1.9	1.51	1.52	1.28	1.08	1.4	2.1	1.87	1.35
	1.43	1.59	1.65	1.23	1.87	1.43	1.55	1.45	1.41	1.2	1.46	1.69	1.05	1.33	0.98	1.51	1.6	1.89	1.86
	1.87	2.03	1.51	1.35	1.67	1.6	1.76	1.11	1.38	1.35	1.18	1.35	2.34	1.41	1.4	1.66	1.26	1.87	1.36
	1.13	1.39	1.87	1.82	1.3	1.4	2.23	1.21	1.91	1.55	1.45	1.33	1.35	1.31	1.37	1.13	1.22	1.46	1.69
	1.34	1.23	1.43	1.91	1.11	1.5	1.56	1.58	2.16	1.16	1.39	1.57	1.16	1.79	1.31	1.72	1.78	1.63	1.97
	1.19	1	1.4	1.54	1.61	1.14	1.29	1.13	1.22	1.28	1.05	1.38	1.61	1.67	1.61	1.15	2.04	1.4	1.91
	1.63	1.52	1.16	1.34	1.38	1.39	1.34	1.32	1.38	1.14	1.39	1.17	1.72	1.21	1.73	1.8	1.63	1.25	1.98
	1.14	1.15	1.14	1.37	1.28	1.93	1.17	1.13	1.52	1.32	1.4	1.42	1.22	1.54	1.65	1.73	1.45	1.66	1.17
	1.53	1.82	1.06	1.36	1.44	1.43	1.7	1.13	1.14	1.33	1.29	1.41	1.16	1.3	1.63	1.23	1.76	1.32	1.5
	1.62	1.44	1.21	1.38	1.27	1.76	1.56	1.02	1.65	1.14	1.19	1.17	1.51	1.25	1.76	1.24	1.82	1.38	1.48
	2.02	1.53	1.17	1.27	1.41	1.96	1.47	1.38	1.24	1.19	1.23	1.03	1.42	1.35	1.26	1.89	1.53	1.64	1.44
	1.65	1.66	1.7	1.66	1.39	1.07	1.17	1.14	1.16	1.4	1.24	1.63	0.87	1.27	1.31	1.3	1.81	2.08	1.12
	1.55	1.17	1.44	1.71	1.59	1.6	1.7	1.07	1.31	1.32	1.03	1.26	1.18	1.51	1.96	1.25	1.59	1.23	1.66
	1.63	1.33	1.35	1.4	1.15	1.61	1.29	1.12	1.38	1.44	1.26	1.08	1.62	1.23	1.35	1.08	1.52	1.29	1.86
	1.55	1.2	1.22	1.35	1.3	1.71	1.43	1.13	1.36	1.16	1.33	1.35	1.46	1.37	1.49	1.55	1.92	1.84	1.49
	1.55	1.5	1.02	1.8	1.76	1.39	1.55	1.15	1.23	1.38	1.27	1.43	1.14	1.28	1.19	1.18	1.26	1.73	1.44
	1.41	1.31	1.37	1.39	1.6	1.19	1.38	1.74	1.54	1.19	1.55	1.6	1.31	1.05	1.12	1.58	1.7	1.12	1.3
	1.34	1.2	1.01	1.4	1.67	1.12	1.24	1.17	1.21	1.09	1.31	0.96	1.34	1.19	1.32	1.6	1.95	1.37	1.6
	1.2	1.56	1.16	1.95	1.9	1.65	1.79	1.29	2.09	1.11	1.51	1.02	1.36	1.2	1.38	1.01	1.52	1.42	1.49
	1.2	1.47	1.52	1.71	1.44	1.62	1.56	1.46	1.92	1.21	1.35	1.09	1.44	1.13	1.96	1.29	1.23	2.06	1.5
	1.18	1.13	1.36	1.67	1.48	1.16	1.44	1.46	1.44	1.51	1.31	1.2	1.21	1.05	1.25	1.71	1.79	1.5	1.51
	1.28	1.38	1.36	1.6	1.28	1.41	1.24	1.33	1.73	1.63	1.45	1.26	1.6	1.5	1.16	1.35	1.68	1.49	1.39
	1.39	1.19	1.45	1.71	1.57	1.47	1.44	1.03	1.89	1.23	1.26	1.64	1.52	1.35	1.49	1.31	2.2	2.1	2.24
	1.84	1.43	1.1	1.59	1.32	1.33	1.34	1.4	1.97	1.26	1.25	1.28	1.57	1.51	0.98	1.79	2.05	1.84	1.35
	1.24	1.39	1.15	1.28	1.11	1.35	1.09	1.24	1.96	1	1.52	1.73	1.36	1.26	1.69	1.6	1.84	1.52	1.99
	1.13	1.22	0.99	1.55	1.17	1.24	1.41	0.96	1.21	1.2	1.31	1.22	1.12	1.23	1.2	1.74	1.82	1.58	1.6
	1.74	1.45	1	1.56	1.25	1.28	1.96	1.61	1.36	1.71	1.28	1.35	1.12	1.14	1.86	1.27	1.94	1.78	1.54
	1.75	1.26	1.29	1.29	1.14	1.88	1.75	1.21	2.25	1.36	1.21	1.54	1.4	1.46	1.15	1.37	1.94	1.54	1.12
	1.5	1.17	1.84	1.39	1.6	1.17	1.9	1.61	1.93	1.31	1.28	1.47	1.07	1.48	1.32	1.23	1.71	1.73	2.29
	1.46	1.21	1.59	1.36	1.68	1.42	1.45	1.46	1.48	0.9	1.22	1.06	1.28	1.43	1.4	1.33	2.94	1.35	1.12
	1.73	1.27	1.67	1.52	1.57	1.61	1.26	1.67	1.82	1.03	1.63	1.66	1.67	1.79	1.5	1.32	1.97	1.27	1.93
	1.55	1.71	1.38	1.17	1.59	1.12	1.69	1.23	1.51	1.25	1.47	1.2	0.92	1.21	1.27	1.26	1.71	1.33	1.54
	1.65	1.4	1.38	1.25	1.43	1.78	1.83	1.26	1.25	1.46	1.49	1.35	1.08	1.48	1.08	1.36	1.97	1.11	1.65
	1.72	1.64	1.39	1.21	1.42	1.37	1.46	1.26	1.59	1.02	1.42	1.05	1.1	1.41	1.29	1.23	1.54	1.16	2.3
	1.05	1.51	1.1	1.57	1.3	1.71	1.32	1.16	2.01	1.37	1.68	1.25	1.48	1.11	1.38	1.41	1.48	1.88	1.38
	1.23	1.31	1.71	1.37	1.75	1.61	1.91	1.36	1.71	1.63	1.25	1.27	1.35	1.36	1.2	1.15	1.64	1.51	1.53
	1.51	1.46	1.5	1.44	1.86	1.76	1.81	1.4	1.81	1.16	1.14	1.45	1.17	1.29	1.51	1.32	1.82	1.44	1.42
	1.92	0.75	1.66	1.53	1.39	1.47	1.66	1.32	1.39	1.34	1.43	0.97	1.57	1.63	1.55	1.36	1.43	1.95	1.35
	1.14	1.52	1.14	1.57	1.58	1.63	1.46	1.44	1.51	1.21	1.25	1.08	1.14	1.46	1.23	1.32	1.46	1.66	2.19
	1.3	1.11	1.08	1.38	1.5	2.01	1.46	1.2	1.28	1.11	0.99	1.6	1.33	1.33	1.49	1.76	1.81	1.2	1.44
	1.8	1.71	1.4	1.36	1.63	1.42	1.29	1.37	1.83	1.06	1.24	1.23	1.18	1.41	1.09	1.17	1.63	1.55	1.89
	1.3	1.33	1.86	1.33	1.85	1.55	1.5	1.25	1.35	1.46	1.23	1.09	1.52	1.38	1.62	1.37	1.39	1.21	1.1
	2.08	1.33	1.79	1.35	1.32	1.34	1.87	1.52	1.66	1.56	1.25	1.57	1.22	1.54	1.55	1.5	1.92	1.96	1.87
	1.16	1.82	1.19	1.11	1.08	1.5	1.55	1.14	1.67	1.2	1.16	1.37	1.79	1.24	1.28	1.31	1.39	1.14	1.53
	1.36	1.08	1.36	1.4	1.57	1.33	1.34	1.38	2.4	1.47	1.92	0.98	1.32	1.58	1.23	1.42	1.5	1.39	1.8
	1.68	1.36	1.32	1.53	1.71	1.37	1.54	1.13	1.24	1.19	1.47	1.35	1.6	1.19	1.46	1.35	2.53	1.28	1.68
	1.45	1.65	1.62	1.14	1.25	1.57	1.2	1.2	1.4	1.38	1.23	1.22	1.18	1.39	1.17	1.6	2.07	1.06	1.49
	1.27	1.31	1.21	1.41	2.04	1.19	1.47	1.2	1.5	1.27	1.22	1.21	1.16	1.44	1.35	1.18	1.82	1.34	2
	1.36	1.25	1.73	1.46	1.6	1.68	1.48	1.3	1.59	1.17	1.21	1.22	1.3	1.61	1.83	1.48	1.6	1.41	1.83
	1.38	1.5	1.42	1.77	1.94	1.58	1.84	1.12	1.66	1.38	1.41	1.17	1.66	1.33	1.07	1.53	1.68	1.47	1.54
	1.55	1.14	1.28	1.19	1.17	1.33	1.64	1.12	1.65	1.02	1.66	1.52	1.47	1.57	1.53	1.38	1.45	1.43	1.87
	1.32	1.32	1.36	1.3	1.58	1.42	1.29	1.51	2.16	1.33	1.7	1.46	1.25	1.59	1.23	1.03	1.79	1.25	1.48
	1.26	1.45	1.44	1.4	1.44	0.95	1.18	1.13	1.57	1.37	1.32	1.4	1.29	1.39	1.61	1.18	1.48	1.24	1.89
	1.17	1.28	1.39	1.65	1.68	1.03	1.87	1.61	2.3	1.23	1.58	1.23	1.53	1.25	1.16	1.82	1.6	1.43	1.81
	1.23	1.55	1.26	1.66	1.08	1.26	1.45	0.99	1.91	1.14	1.27	1.24	1.09	1.36	0.96	1.36	1.9	1.7	1.33
	0.84	1.77	1.6	1.21	1.44	1.41	2.07	1.31	1.72	1.36	1.28	1.1	1.36	1.13	1.2	1.6	2.13	2.23	1.64
	1.16	1.14	1.72	1.3	1.47	2.03	1.69	1.21	1.44	1.2	1.22	1.31	1.16	1.36	1.74	1.45	1.74	1.73	1.84
	1.29	1.53	1.42	1.71	1.11	1.2	1.12	1.53	2.22	1.16	1.63	1	1.3	1.41	0.99	1.24	1.66	1.32	1.89
	1.19	1.4	1.29	1.16	1.14	1.2	1.49	0.96	2.01	1.44	1.47	1.15	1.15	1.39	1.35	1.61	1.78	1.89	1.94
	1.38	1.86	1.07	1.14	1.41	1.29	1.47	1.05	1.27	1.22	1.49	1.46	1.17	1.55	1.59	1.52	1.48	1.47	2.03
	1.21	1.42	1.75	1.46	1.12	1.35	1.36	0.9	1.48	1.07	1.42	1.05	1.49	1.51	1.2	1.54	1.84	1.63	1.75
	1.3	1.65	2	1.31	1.16	1.65	1.01	1.15	1.64	1.43	1.68	1.71	1.49	1.19	1.24	1.13	1.37	2.13	1.45
	1	1.48	1.01	1.39	1.67	1.51	1.66	1.01	2.12	1.53	1.25	1.58	1.38	1.16	1.68	1.46	1.37	1.9	1.55
	1.27	1.5	1.41	1.32	1.79	1.25	1.44	1.13	1.53	1.34	1.14	0.98	1.55	1.43	1.48	1.2	1.4	1.4	1.63
	1.36	1.28	1.51	1.8	1.35	1.67	1.49	1.05	1.68	1.01	1.43	1.38	1.43	1.41	1.05	1.16	1.95	1.89	1.9
	1.44	1.56	1.61	1.59	1.78	1.84	1.33	1.43	1.35	1.17	1.25	1.51	1.18	1.11	1.41	1.29	1.51	1.48	2.28
	1.12	1.72	1.3	1.52	1.25	1.56	1.66	1.3	1.41	0.94	0.99	1.2	1.14	1.38	1.12	1.24	1.38	1.59	2.21
	1.16	1.14	1.51	1.87	1.89	1.57	1.48	1.26	1.39	0.94	1.24	1.12	1.36	1.24	1.44	1.97	2.01	1.71	1.16
	1.63	1.47	1.62	1.44	1.59	1.28	1.37	1.44	1.24	1.37	1.23	1.5	1.32	1.23	1.21	1.44	1.32	1.94	1.58
	1.88	1.24	1.17	1.23	1.57	1.49	1.66	1.29	1.3	1.24	1.25	1.27	0.96	1.16	1.37	1.52	1.66	1.63	1.74
	1.53	1.63	1.17	1.52	1.73	1.36	1.26	1.21	2.13	2.03	1.16	1.55	1.3	0.98	1.57	1.55	1.84	1.75	1.81
	1.28	1.21	1.44	1.31	1.25	1.08	1.4	1.18	1.98	1.21	1.92	1.18	1.03	1.21	1.26	1.37	1.65	1.69	1.85
	1.65	1.14	1.01	1.09	1.29	1.59	1.52	1.22	2.17	1.21	1.47	1.18	1.22	1.3	1.28	1.38	1.33	1.53	1.31
	1.4	1.61	1.45	1.33	1.37	1.78	1.86	1.36	1.6	1.08	1.23	1.38	1.73	0.97	0.96	1.55	1.36	1.49	1.22
	1.85	1.87	1.16	1.22	1.82	1.25	1.88	1	1.36	1.31	1.22	1.06	1.1	1.38	1.34	1.48	1.38	1.87	1.39
	1.19	1.47	0.98	1.73	1.45	1.01	1.52	1.29	1.79	1.53	1.21	1.49	1.1	1.41	1.35	1.38	1.24	2.03	1.92
	1.74	1.68	1.18	1.22	1.25	1.93	1.45	1.1	1.67	1.18	1.41	1.4	2.21	1.4	1.54	1.52	1.4	1.37	1.83
	2.08	1.58	1.36	1.48	1.98	1.61	1.39	1.17	1.52	1.17	1.66	1.61	1.21	1.4	1.17	1.11	1.39	1.59	2.01
	1.47	1.02	1.23	1.64	1.63	1.47	1.49	1.17	1.83	1.14	1.7	1.25	1.48	1.26	1.72	1.82	1.95	1.58	1.97
	1.71	1.42	1.34	1.49	1.75	1.2	1.41	1.32	1.75	1.24	1.32	1.59	1.45	1.23	1.19	1.21	1.46	1.71	1.5
	1.35	1.87	1.07	1.62	1.67	1.31	1.74	1.08	1.28	1.37	1.58	1.41	1.04	1.62	1.95	1.41	1.97	1.5	1.74
	1.18	1.05	1.43	1.46	1.22	1.64	1.29	1.26	1.51	1.05	1.27	1	1.16	1.7	1.48	1.29	1.55	1.81	1.42
	1.14	1.02	1.28	1.49	1.43	1.43	1.26	1.12	1.3	0.93	1.3	1.37	1.02	1.36	1.45	1.49	1.44	2.29	1.32
	1.64	1.56	1.45	1.33	1.31	1.34	1.76	1.53	1.69	1.19	1.76	1.36	1.13	1.48	1.56	1.17	1.49	1.59	2.29
	1.68	0.95	1.34	1.13	1.5	1.99	1.36	0.96	1.55	1.33	1.14	1.58	1.7	1.62	1.14	1.16	1.48	1.34	1.57
	1.32	1.76	1.78	1.63	1.97	1.87	1.29	1.11	1.8	1.66	1.16	1.35	1.31	0.97	1.37	1.55	2.18	1.23	1.59
	1.72	1.45	1.4	1.31	1.76	1.66	1.16	0.94	1.52	1.57	1.31	1.25	1.36	1.33	1.61	1.38	2.04	1.63	1.89
	1.83	1.12	1.18	1.23	1.37	1.46	1.54	1.6	1.78	1.56	1.28	1.15	1.28	1.42	1.15	1.31	1.62	1.31	1.84
	1.82	1.59	1.41	1.52	1.72	1.63	1.25	1.26	1.46	1.38	1.63	1.45	1.42	1.36	1.2	1.7	1.33	1.98	1.61
	1.79	1.15	1.32	1.4	2.02	1.31	1.35	1.32	1.81	1.03	1.3	1.25	1.69	1.22	1.11	1.25	1.7	1.6	1.77
	1.73	1.5	1.82	1.42	1.84	1.36	1.44		1.87	1.47	1.37	1.34	1.62	1.31	1.7	1.07	2.04	1.57	1.43
	1.61	1.52	1.35	1.71	1.6	1.47	1.62		1.82	1.56	1.12	1.2	1.27	1.29	1.16	1.17	2.01	1.71	1.48
	1.4	1.36	1.75	1.49	1.03	1.81	1.59		2.28	1.85	1.05	1.46	1.18	1.47	1.23	1.3	1.73	1.7	1.32
	1.29	1.39	1.6	1.41	1.25	1.84	1.42		1.7	1.05	1.34	1.41	1.08	1.25	1.31	1.14	1.96	1.4	1.99
	1.2	1.24	1.16	1.46	1.16	1.22	1.34		1.47	0.95	1.45	1.07	1.72	1.47	1.15	1.26	1.37	1.36	1.93
	2.06	1.02	0.89	1.4	1.81	1.46	1.58		1.22	1.24	1.59	1.21	0.92	1.42	1.23	1.6	2.04		1.7
	0.93	1.25	1.2	1.28	1.6	1.71	1.16		1.97	1.57	1.1	1.59	1.24	1.06	1.35	1.74	1.78		1.93
	1.16	1.15	1.28	1.55	1.68	1.75	2.12		1.61	1.4	1.13	1.24	1.55	1.45	0.95	1.23	1.93
	1.43		1.52	1.35	1.51	1.26	1.15		1.98	1.29	1.17	1.42	1.34	1.57	1.75	1.14	1.41
	1.38		1.21	1.14	1.2		1.37			1.11	1.68	1.23		1.3	1.71	1.34
	1.28		1.54	1.63	1.24		1.7				1.44	1.26		1.28	1.32	1.21
	1.46		1.72	1.51	1.72		1.75				1.33	1.08		1.19	1.76	1.49
	1.52		1.46	1.67	1.54		1.05				1.33	1.64		1.61	1.35	1.49
	1.19		1.26	1.14	1.6		1.44				1.71	1.35		1.3	0.97	1.74
	1.6		1.19	1	1.53		2.16				1.51	1.11		1.34	1.38	1.3
			1.45	1.07	1.77		1.65				1.12	1.83		1.13		1.57
			1.67	1.15	1.17		1.31				1.28	1.5				1.24
				1.27	1.28		1.72				1.14	1.4				1.25
				1.52	1.25		1.85				1.24	1.27				1.58
					1.52		1.78				1.19	1.25				1.7
					1.61		1.53				1.23	1.65				1.58
					1.25		1.39				1.38	1.35				1.74
					1.35		1.78				1.22	1.34				1.52
					1.6		1.24				1.17	1.53				1.42
					1.08		1.08				1.37	1.58				1.4
					1.08		1.26				1.08	1.38				1.54
					1.05		1.7				1.6	1.16				1.25
					1.29		1.34				1.49	1.2				1.35
					1.14		1.16				1.61	1.65				1.31
					1.52		1.63				1.37	1.16				1.07
					1.71		1.75				1.3					1.07
					1.27						1.23					1.37
					1.47						1.29					1.23
											1.11					1.15
											1.6					1.46
											1.21					1.34
											1.31					1.28
											1.05					1.24
											1.53
											1.2
											1.65
											1.46
											1.11
											1.01
											1.39
											0.98
											1
											1.3
											1.15
											1.21
											1.4
											1.3
											1.36
											1.29
											1.07
											0.93
											1.43
											1.64
											1.28
